# Supplementary material for: Baltic Sea shipwrecks as a source of hazardous pollution
Source: PeerJ journal article supplement (doi:10.7717/peerj-achem.31), 2024-03-28
Supplement: RawData.xlsx [file RawData.xlsx]

## Sheet: Arkusz1
Shipwreck	Sampling point	x-coordinate	y-coordinate	Sample collection date	Sample delivery date	Analysis	Unit	Limit of quantification	Result
S/T Burgmeister Petersen	SW	476978.06	769792.24	2011-10-16	2011-10-17	benzo[a]anthracene	mg/kg d.w.	0.001	0.002
S/T Burgmeister Petersen	SW	476978.06	769792.24	2011-10-16	2011-10-17	benzo[b]fluoranthene	mg/kg d.w.	0.001	<0.001
S/T Burgmeister Petersen	SW	476978.06	769792.24	2011-10-16	2011-10-17	benzo[k]fluoranthene	mg/kg d.w.	0.001	<0.001
S/T Burgmeister Petersen	SW	476978.06	769792.24	2011-10-16	2011-10-17	benzo[a]pyrene	mg/kg d.w.	0.001	<0.001
S/T Burgmeister Petersen	SW	476978.06	769792.24	2011-10-16	2011-10-17	indeno[1,2,3-cd]pyrene	mg/kg d.w.	0.001	0.001
S/T Burgmeister Petersen	SW	476978.06	769792.24	2011-10-16	2011-10-17	dibenzo[a,h]anthracene	mg/kg d.w.	0.001	<0.001
S/T Burgmeister Petersen	SW	476978.06	769792.24	2011-10-16	2011-10-17	benzo[ghi]perylene	mg/kg d.w.	0.001	<0.001
S/T Burgmeister Petersen	SW	476978.06	769792.24	2011-10-16	2011-10-17	∑PAH	mg/kg d.w.	0.001	0.003
S/T Burgmeister Petersen	SW	476978.06	769792.24	2011-10-16	2011-10-17	TPH	mg/kg d.w.	5.0	<5.0
S/T Burgmeister Petersen	SE	477029.07	769767.41	2011-10-16	2011-10-17	benzo[a]anthracene	mg/kg d.w.	0.001	0.47
S/T Burgmeister Petersen	SE	477029.07	769767.41	2011-10-16	2011-10-17	benzo[b]fluoranthene	mg/kg d.w.	0.001	0.20
S/T Burgmeister Petersen	SE	477029.07	769767.41	2011-10-16	2011-10-17	benzo[k]fluoranthene	mg/kg d.w.	0.001	0.08
S/T Burgmeister Petersen	SE	477029.07	769767.41	2011-10-16	2011-10-17	benzo[a]pyrene	mg/kg d.w.	0.001	0.17
S/T Burgmeister Petersen	SE	477029.07	769767.41	2011-10-16	2011-10-17	indeno[1,2,3-cd]pyrene	mg/kg d.w.	0.001	0.18
S/T Burgmeister Petersen	SE	477029.07	769767.41	2011-10-16	2011-10-17	dibenzo[a,h]anthracene	mg/kg d.w.	0.001	0.018
S/T Burgmeister Petersen	SE	477029.07	769767.41	2011-10-16	2011-10-17	benzo[ghi]perylene	mg/kg d.w.	0.001	0.083
S/T Burgmeister Petersen	SE	477029.07	769767.41	2011-10-16	2011-10-17	∑PAH	mg/kg d.w.	0.001	1.2
S/T Burgmeister Petersen	SE	477029.07	769767.41	2011-10-16	2011-10-17	TPH	mg/kg d.w.	5.0	51
S/T Burgmeister Petersen	NW	477956.11	769864.27	2011-10-16	2011-10-17	benzo[a]anthracene	mg/kg d.w.	0.001	0.010
S/T Burgmeister Petersen	NW	477956.11	769864.27	2011-10-16	2011-10-17	benzo[b]fluoranthene	mg/kg d.w.	0.001	0.011
S/T Burgmeister Petersen	NW	477956.11	769864.27	2011-10-16	2011-10-17	benzo[k]fluoranthene	mg/kg d.w.	0.001	0.008
S/T Burgmeister Petersen	NW	477956.11	769864.27	2011-10-16	2011-10-17	benzo[a]pyrene	mg/kg d.w.	0.001	<0.001
S/T Burgmeister Petersen	NW	477956.11	769864.27	2011-10-16	2011-10-17	indeno[1,2,3-cd]pyrene	mg/kg d.w.	0.001	<0.001
S/T Burgmeister Petersen	NW	477956.11	769864.27	2011-10-16	2011-10-17	dibenzo[a,h]anthracene	mg/kg d.w.	0.001	<0.001
S/T Burgmeister Petersen	NW	477956.11	769864.27	2011-10-16	2011-10-17	benzo[ghi]perylene	mg/kg d.w.	0.001	<0.001
S/T Burgmeister Petersen	NW	477956.11	769864.27	2011-10-16	2011-10-17	∑PAH	mg/kg d.w.	0.001	0.029
S/T Burgmeister Petersen	NW	477956.11	769864.27	2011-10-16	2011-10-17	TPH	mg/kg d.w.	5.0	7.0
S/T Burgmeister Petersen	NE	477017.77	769825.63	2011-10-16	2011-10-17	benzo[a]anthracene	mg/kg d.w.	0.001	<0.001
S/T Burgmeister Petersen	NE	477017.77	769825.63	2011-10-16	2011-10-17	benzo[b]fluoranthene	mg/kg d.w.	0.001	<0.001
S/T Burgmeister Petersen	NE	477017.77	769825.63	2011-10-16	2011-10-17	benzo[k]fluoranthene	mg/kg d.w.	0.001	<0.001
S/T Burgmeister Petersen	NE	477017.77	769825.63	2011-10-16	2011-10-17	benzo[a]pyrene	mg/kg d.w.	0.001	<0.001
S/T Burgmeister Petersen	NE	477017.77	769825.63	2011-10-16	2011-10-17	indeno[1,2,3-cd]pyrene	mg/kg d.w.	0.001	<0.001
S/T Burgmeister Petersen	NE	477017.77	769825.63	2011-10-16	2011-10-17	dibenzo[a,h]anthracene	mg/kg d.w.	0.001	<0.001
S/T Burgmeister Petersen	NE	477017.77	769825.63	2011-10-16	2011-10-17	benzo[ghi]perylene	mg/kg d.w.	0.001	<0.001
S/T Burgmeister Petersen	NE	477017.77	769825.63	2011-10-16	2011-10-17	∑PAH	mg/kg d.w.	0.001	<0.001
S/T Burgmeister Petersen	NE	477017.77	769825.63	2011-10-16	2011-10-17	TPH	mg/kg d.w.	5.0	<5.0
m/s Sleipner	S1	443881.76	775913.88	-	2016-02-22	benzo[a]anthracene	mg/kg d.w.	0.001	0.002
m/s Sleipner	S1	443881.76	775913.88	-	2016-02-22	benzo[b]fluoranthene	mg/kg d.w.	0.001	0.001
m/s Sleipner	S1	443881.76	775913.88	-	2016-02-22	benzo[k]fluoranthene	mg/kg d.w.	0.001	<0.001
m/s Sleipner	S1	443881.76	775913.88	-	2016-02-22	benzo[a]pyrene	mg/kg d.w.	0.001	<0.001
m/s Sleipner	S1	443881.76	775913.88	-	2016-02-22	indeno[1,2,3-cd]pyrene	mg/kg d.w.	0.001	<0.001
m/s Sleipner	S1	443881.76	775913.88	-	2016-02-22	dibenzo[a,h]anthracene	mg/kg d.w.	0.001	<0.001
m/s Sleipner	S1	443881.76	775913.88	-	2016-02-22	benzo[ghi]perylene	mg/kg d.w.	0.001	<0.001
m/s Sleipner	S1	443881.76	775913.88	-	2016-02-22	∑PAH	mg/kg d.w.	0.001	0.003
m/s Sleipner	S1	443881.76	775913.88	-	2016-02-22	PCB28	mg/kg d.w.	0.0001	<0.0001
m/s Sleipner	S1	443881.76	775913.88	-	2016-02-22	PCB 52	mg/kg d.w.	0.0001	<0.0001
m/s Sleipner	S1	443881.76	775913.88	-	2016-02-22	PCB 101	mg/kg d.w.	0.0001	<0.0001
m/s Sleipner	S1	443881.76	775913.88	-	2016-02-22	PCB 118	mg/kg d.w.	0.0001	<0.0001
m/s Sleipner	S1	443881.76	775913.88	-	2016-02-22	PCB 138	mg/kg d.w.	0.0001	<0.0001
m/s Sleipner	S1	443881.76	775913.88	-	2016-02-22	PCB 153	mg/kg d.w.	0.0001	<0.0001
m/s Sleipner	S1	443881.76	775913.88	-	2016-02-22	PCB 180	mg/kg d.w.	0.0001	<0.0001
m/s Sleipner	S1	443881.76	775913.88	-	2016-02-22	∑PCB	mg/kg d.w.	0.0001	<0.0001
m/s Sleipner	S1	443881.76	775913.88	-	2016-02-22	TOC	mg/kg d.w.	1000	<1000
m/s Sleipner	S1	443881.76	775913.88	-	2016-02-22	TPH	mg/kg d.w.	5.0	<5.0
m/s Sleipner	S2	443891.03	775883.41	-	2016-02-22	benzo[a]anthracene	mg/kg d.w.	0.001	0.001
m/s Sleipner	S2	443891.03	775883.41	-	2016-02-22	benzo[b]fluoranthene	mg/kg d.w.	0.001	0.001
m/s Sleipner	S2	443891.03	775883.41	-	2016-02-22	benzo[k]fluoranthene	mg/kg d.w.	0.001	0.001
m/s Sleipner	S2	443891.03	775883.41	-	2016-02-22	benzo[a]pyrene	mg/kg d.w.	0.001	<0.001
m/s Sleipner	S2	443891.03	775883.41	-	2016-02-22	indeno[1,2,3-cd]pyrene	mg/kg d.w.	0.001	<0.001
m/s Sleipner	S2	443891.03	775883.41	-	2016-02-22	dibenzo[a,h]anthracene	mg/kg d.w.	0.001	<0.001
m/s Sleipner	S2	443891.03	775883.41	-	2016-02-22	benzo[ghi]perylene	mg/kg d.w.	0.001	<0.001
m/s Sleipner	S2	443891.03	775883.41	-	2016-02-22	∑PAH	mg/kg d.w.	0.001	0.003
m/s Sleipner	S2	443891.03	775883.41	-	2016-02-22	PCB28	mg/kg d.w.	0.0001	<0.0001
m/s Sleipner	S2	443891.03	775883.41	-	2016-02-22	PCB 52	mg/kg d.w.	0.0001	<0.0001
m/s Sleipner	S2	443891.03	775883.41	-	2016-02-22	PCB 101	mg/kg d.w.	0.0001	<0.0001
m/s Sleipner	S2	443891.03	775883.41	-	2016-02-22	PCB 118	mg/kg d.w.	0.0001	<0.0001
m/s Sleipner	S2	443891.03	775883.41	-	2016-02-22	PCB 138	mg/kg d.w.	0.0001	<0.0001
m/s Sleipner	S2	443891.03	775883.41	-	2016-02-22	PCB 153	mg/kg d.w.	0.0001	<0.0001
m/s Sleipner	S2	443891.03	775883.41	-	2016-02-22	PCB 180	mg/kg d.w.	0.0001	<0.0001
m/s Sleipner	S2	443891.03	775883.41	-	2016-02-22	∑PCB	mg/kg d.w.	0.0001	<0.0001
m/s Sleipner	S2	443891.03	775883.41	-	2016-02-22	TOC	mg/kg d.w.	1000	<1000
m/s Sleipner	S2	443891.03	775883.41	-	2016-02-22	TPH	mg/kg d.w.	5.0	<5.0
m/s Sleipner	S3	443900.78	775873.21	-	2016-02-22	benzo[a]anthracene	mg/kg d.w.	0.001	0.001
m/s Sleipner	S3	443900.78	775873.21	-	2016-02-22	benzo[b]fluoranthene	mg/kg d.w.	0.001	<0.001
m/s Sleipner	S3	443900.78	775873.21	-	2016-02-22	benzo[k]fluoranthene	mg/kg d.w.	0.001	<0.001
m/s Sleipner	S3	443900.78	775873.21	-	2016-02-22	benzo[a]pyrene	mg/kg d.w.	0.001	<0.001
m/s Sleipner	S3	443900.78	775873.21	-	2016-02-22	indeno[1,2,3-cd]pyrene	mg/kg d.w.	0.001	<0.001
m/s Sleipner	S3	443900.78	775873.21	-	2016-02-22	dibenzo[a,h]anthracene	mg/kg d.w.	0.001	<0.001
m/s Sleipner	S3	443900.78	775873.21	-	2016-02-22	benzo[ghi]perylene	mg/kg d.w.	0.001	<0.001
m/s Sleipner	S3	443900.78	775873.21	-	2016-02-22	∑PAH	mg/kg d.w.	0.001	0.001
m/s Sleipner	S3	443900.78	775873.21	-	2016-02-22	PCB28	mg/kg d.w.	0.0001	<0.0001
m/s Sleipner	S3	443900.78	775873.21	-	2016-02-22	PCB 52	mg/kg d.w.	0.0001	<0.0001
m/s Sleipner	S3	443900.78	775873.21	-	2016-02-22	PCB 101	mg/kg d.w.	0.0001	<0.0001
m/s Sleipner	S3	443900.78	775873.21	-	2016-02-22	PCB 118	mg/kg d.w.	0.0001	<0.0001
m/s Sleipner	S3	443900.78	775873.21	-	2016-02-22	PCB 138	mg/kg d.w.	0.0001	<0.0001
m/s Sleipner	S3	443900.78	775873.21	-	2016-02-22	PCB 153	mg/kg d.w.	0.0001	<0.0001
m/s Sleipner	S3	443900.78	775873.21	-	2016-02-22	PCB 180	mg/kg d.w.	0.0001	<0.0001
m/s Sleipner	S3	443900.78	775873.21	-	2016-02-22	∑PCB	mg/kg d.w.	0.0001	<0.0001
m/s Sleipner	S3	443900.78	775873.21	-	2016-02-22	TOC	mg/kg d.w.	1000	<1000
m/s Sleipner	S3	443900.78	775873.21	-	2016-02-22	TPH	mg/kg d.w.	5.0	<5.0
m/s Sleipner	S4	443881.17	775837.33	-	2016-02-22	benzo[a]anthracene	mg/kg d.w.	0.001	0.001
m/s Sleipner	S4	443881.17	775837.33	-	2016-02-22	benzo[b]fluoranthene	mg/kg d.w.	0.001	0.001
m/s Sleipner	S4	443881.17	775837.33	-	2016-02-22	benzo[k]fluoranthene	mg/kg d.w.	0.001	<0.001
m/s Sleipner	S4	443881.17	775837.33	-	2016-02-22	benzo[a]pyrene	mg/kg d.w.	0.001	<0.001
m/s Sleipner	S4	443881.17	775837.33	-	2016-02-22	indeno[1,2,3-cd]pyrene	mg/kg d.w.	0.001	<0.001
m/s Sleipner	S4	443881.17	775837.33	-	2016-02-22	dibenzo[a,h]anthracene	mg/kg d.w.	0.001	<0.001
m/s Sleipner	S4	443881.17	775837.33	-	2016-02-22	benzo[ghi]perylene	mg/kg d.w.	0.001	<0.001
m/s Sleipner	S4	443881.17	775837.33	-	2016-02-22	∑PAH	mg/kg d.w.	0.001	0.002
m/s Sleipner	S4	443881.17	775837.33	-	2016-02-22	PCB28	mg/kg d.w.	0.0001	<0.0001
m/s Sleipner	S4	443881.17	775837.33	-	2016-02-22	PCB 52	mg/kg d.w.	0.0001	<0.0001
m/s Sleipner	S4	443881.17	775837.33	-	2016-02-22	PCB 101	mg/kg d.w.	0.0001	<0.0001
m/s Sleipner	S4	443881.17	775837.33	-	2016-02-22	PCB 118	mg/kg d.w.	0.0001	<0.0001
m/s Sleipner	S4	443881.17	775837.33	-	2016-02-22	PCB 138	mg/kg d.w.	0.0001	<0.0001
m/s Sleipner	S4	443881.17	775837.33	-	2016-02-22	PCB 153	mg/kg d.w.	0.0001	<0.0001
m/s Sleipner	S4	443881.17	775837.33	-	2016-02-22	PCB 180	mg/kg d.w.	0.0001	<0.0001
m/s Sleipner	S4	443881.17	775837.33	-	2016-02-22	∑PCB	mg/kg d.w.	0.0001	<0.0001
m/s Sleipner	S4	443881.17	775837.33	-	2016-02-22	TOC	mg/kg d.w.	1000	<1000
m/s Sleipner	S4	443881.17	775837.33	-	2016-02-22	TPH	mg/kg d.w.	5.0	<5.0
m/s Sleipner	S5	443860.96	775886.16	-	2016-02-22	benzo[a]anthracene	mg/kg d.w.	0.001	0.002
m/s Sleipner	S5	443860.96	775886.16	-	2016-02-22	benzo[b]fluoranthene	mg/kg d.w.	0.001	0.001
m/s Sleipner	S5	443860.96	775886.16	-	2016-02-22	benzo[k]fluoranthene	mg/kg d.w.	0.001	<0.001
m/s Sleipner	S5	443860.96	775886.16	-	2016-02-22	benzo[a]pyrene	mg/kg d.w.	0.001	<0.001
m/s Sleipner	S5	443860.96	775886.16	-	2016-02-22	indeno[1,2,3-cd]pyrene	mg/kg d.w.	0.001	<0.001
m/s Sleipner	S5	443860.96	775886.16	-	2016-02-22	dibenzo[a,h]anthracene	mg/kg d.w.	0.001	<0.001
m/s Sleipner	S5	443860.96	775886.16	-	2016-02-22	benzo[ghi]perylene	mg/kg d.w.	0.001	<0.001
m/s Sleipner	S5	443860.96	775886.16	-	2016-02-22	∑PAH	mg/kg d.w.	0.001	0.003
m/s Sleipner	S5	443860.96	775886.16	-	2016-02-22	PCB28	mg/kg d.w.	0.0001	<0.0001
m/s Sleipner	S5	443860.96	775886.16	-	2016-02-22	PCB 52	mg/kg d.w.	0.0001	<0.0001
m/s Sleipner	S5	443860.96	775886.16	-	2016-02-22	PCB 101	mg/kg d.w.	0.0001	<0.0001
m/s Sleipner	S5	443860.96	775886.16	-	2016-02-22	PCB 118	mg/kg d.w.	0.0001	<0.0001
m/s Sleipner	S5	443860.96	775886.16	-	2016-02-22	PCB 138	mg/kg d.w.	0.0001	<0.0001
m/s Sleipner	S5	443860.96	775886.16	-	2016-02-22	PCB 153	mg/kg d.w.	0.0001	<0.0001
m/s Sleipner	S5	443860.96	775886.16	-	2016-02-22	PCB 180	mg/kg d.w.	0.0001	<0.0001
m/s Sleipner	S5	443860.96	775886.16	-	2016-02-22	∑PCB	mg/kg d.w.	0.0001	<0.0001
m/s Sleipner	S5	443860.96	775886.16	-	2016-02-22	TOC	mg/kg d.w.	1000	<1000
m/s Sleipner	S5	443860.96	775886.16	-	2016-02-22	TPH	mg/kg d.w.	5.0	<5.0
t/s Franken	F1	497785.69	741711.74	-	2016-03-03	benzo[a]anthracene	mg/kg d.w.	0.001	0.081
t/s Franken	F1	497785.69	741711.74	-	2016-03-03	benzo[b]fluoranthene	mg/kg d.w.	0.001	0.20
t/s Franken	F1	497785.69	741711.74	-	2016-03-03	benzo[k]fluoranthene	mg/kg d.w.	0.001	0.095
t/s Franken	F1	497785.69	741711.74	-	2016-03-03	benzo[a]pyrene	mg/kg d.w.	0.001	0.064
t/s Franken	F1	497785.69	741711.74	-	2016-03-03	indeno[1,2,3-cd]pyrene	mg/kg d.w.	0.001	0.18
t/s Franken	F1	497785.69	741711.74	-	2016-03-03	dibenzo[a,h]anthracene	mg/kg d.w.	0.001	0.024
t/s Franken	F1	497785.69	741711.74	-	2016-03-03	benzo[ghi]perylene	mg/kg d.w.	0.001	0.12
t/s Franken	F1	497785.69	741711.74	-	2016-03-03	∑PAH	mg/kg d.w.	0.001	0.76
t/s Franken	F1	497785.69	741711.74	-	2016-03-03	PCB28	mg/kg d.w.	0.0001	0.0003
t/s Franken	F1	497785.69	741711.74	-	2016-03-03	PCB 52	mg/kg d.w.	0.0001	0.0004
t/s Franken	F1	497785.69	741711.74	-	2016-03-03	PCB 101	mg/kg d.w.	0.0001	0.0007
t/s Franken	F1	497785.69	741711.74	-	2016-03-03	PCB 118	mg/kg d.w.	0.0001	0.0004
t/s Franken	F1	497785.69	741711.74	-	2016-03-03	PCB 138	mg/kg d.w.	0.0001	0.0006
t/s Franken	F1	497785.69	741711.74	-	2016-03-03	PCB 153	mg/kg d.w.	0.0001	0.0005
t/s Franken	F1	497785.69	741711.74	-	2016-03-03	PCB 180	mg/kg d.w.	0.0001	0.0003
t/s Franken	F1	497785.69	741711.74	-	2016-03-03	∑PCB	mg/kg d.w.	0.0001	0.0032
t/s Franken	F1	497785.69	741711.74	-	2016-03-03	TOC	mg/kg d.w.	1000	50243
t/s Franken	F1	497785.69	741711.74	-	2016-03-03	TPH	mg/kg d.w.	5.0	266
t/s Franken	F2	497885.42	741700.22	-	2016-03-03	benzo[a]anthracene	mg/kg d.w.	0.001	0.013
t/s Franken	F2	497885.42	741700.22	-	2016-03-03	benzo[b]fluoranthene	mg/kg d.w.	0.001	0.038
t/s Franken	F2	497885.42	741700.22	-	2016-03-03	benzo[k]fluoranthene	mg/kg d.w.	0.001	0.019
t/s Franken	F2	497885.42	741700.22	-	2016-03-03	benzo[a]pyrene	mg/kg d.w.	0.001	0.006
t/s Franken	F2	497885.42	741700.22	-	2016-03-03	indeno[1,2,3-cd]pyrene	mg/kg d.w.	0.001	0.031
t/s Franken	F2	497885.42	741700.22	-	2016-03-03	dibenzo[a,h]anthracene	mg/kg d.w.	0.001	0.004
t/s Franken	F2	497885.42	741700.22	-	2016-03-03	benzo[ghi]perylene	mg/kg d.w.	0.001	0.022
t/s Franken	F2	497885.42	741700.22	-	2016-03-03	∑PAH	mg/kg d.w.	0.001	0.13
t/s Franken	F2	497885.42	741700.22	-	2016-03-03	PCB28	mg/kg d.w.	0.0001	0.0003
t/s Franken	F2	497885.42	741700.22	-	2016-03-03	PCB 52	mg/kg d.w.	0.0001	<0.0001
t/s Franken	F2	497885.42	741700.22	-	2016-03-03	PCB 101	mg/kg d.w.	0.0001	0.0004
t/s Franken	F2	497885.42	741700.22	-	2016-03-03	PCB 118	mg/kg d.w.	0.0001	0.0001
t/s Franken	F2	497885.42	741700.22	-	2016-03-03	PCB 138	mg/kg d.w.	0.0001	<0.0001
t/s Franken	F2	497885.42	741700.22	-	2016-03-03	PCB 153	mg/kg d.w.	0.0001	<0.0001
t/s Franken	F2	497885.42	741700.22	-	2016-03-03	PCB 180	mg/kg d.w.	0.0001	<0.0001
t/s Franken	F2	497885.42	741700.22	-	2016-03-03	∑PCB	mg/kg d.w.	0.0001	0.0008
t/s Franken	F2	497885.42	741700.22	-	2016-03-03	TOC	mg/kg d.w.	1000	20887
t/s Franken	F2	497885.42	741700.22	-	2016-03-03	TPH	mg/kg d.w.	5.0	75
t/s Franken	F3	497927.53	741647.668	-	2016-03-03	benzo[a]anthracene	mg/kg d.w.	0.001	0.004
t/s Franken	F3	497927.53	741647.668	-	2016-03-03	benzo[b]fluoranthene	mg/kg d.w.	0.001	0.013
t/s Franken	F3	497927.53	741647.668	-	2016-03-03	benzo[k]fluoranthene	mg/kg d.w.	0.001	0.004
t/s Franken	F3	497927.53	741647.668	-	2016-03-03	benzo[a]pyrene	mg/kg d.w.	0.001	0.002
t/s Franken	F3	497927.53	741647.668	-	2016-03-03	indeno[1,2,3-cd]pyrene	mg/kg d.w.	0.001	0.006
t/s Franken	F3	497927.53	741647.668	-	2016-03-03	dibenzo[a,h]anthracene	mg/kg d.w.	0.001	0.001
t/s Franken	F3	497927.53	741647.668	-	2016-03-03	benzo[ghi]perylene	mg/kg d.w.	0.001	0.005
t/s Franken	F3	497927.53	741647.668	-	2016-03-03	∑PAH	mg/kg d.w.	0.001	0.035
t/s Franken	F3	497927.53	741647.668	-	2016-03-03	PCB28	mg/kg d.w.	0.0001	0.0001
t/s Franken	F3	497927.53	741647.668	-	2016-03-03	PCB 52	mg/kg d.w.	0.0001	<0.0001
t/s Franken	F3	497927.53	741647.668	-	2016-03-03	PCB 101	mg/kg d.w.	0.0001	<0.0001
t/s Franken	F3	497927.53	741647.668	-	2016-03-03	PCB 118	mg/kg d.w.	0.0001	0.0001
t/s Franken	F3	497927.53	741647.668	-	2016-03-03	PCB 138	mg/kg d.w.	0.0001	<0.0001
t/s Franken	F3	497927.53	741647.668	-	2016-03-03	PCB 153	mg/kg d.w.	0.0001	<0.0001
t/s Franken	F3	497927.53	741647.668	-	2016-03-03	PCB 180	mg/kg d.w.	0.0001	<0.0001
t/s Franken	F3	497927.53	741647.668	-	2016-03-03	∑PCB	mg/kg d.w.	0.0001	0.0002
t/s Franken	F3	497927.53	741647.668	-	2016-03-03	TOC	mg/kg d.w.	1000	23801
t/s Franken	F3	497927.53	741647.668	-	2016-03-03	TPH	mg/kg d.w.	5.0	107
t/s Franken	F4	497885.26	741618.29	-	2016-03-03	benzo[a]anthracene	mg/kg d.w.	0.001	0.005
t/s Franken	F4	497885.26	741618.29	-	2016-03-03	benzo[b]fluoranthene	mg/kg d.w.	0.001	0.013
t/s Franken	F4	497885.26	741618.29	-	2016-03-03	benzo[k]fluoranthene	mg/kg d.w.	0.001	0.006
t/s Franken	F4	497885.26	741618.29	-	2016-03-03	benzo[a]pyrene	mg/kg d.w.	0.001	0.002
t/s Franken	F4	497885.26	741618.29	-	2016-03-03	indeno[1,2,3-cd]pyrene	mg/kg d.w.	0.001	0.007
t/s Franken	F4	497885.26	741618.29	-	2016-03-03	dibenzo[a,h]anthracene	mg/kg d.w.	0.001	0.001
t/s Franken	F4	497885.26	741618.29	-	2016-03-03	benzo[ghi]perylene	mg/kg d.w.	0.001	0.005
t/s Franken	F4	497885.26	741618.29	-	2016-03-03	∑PAH	mg/kg d.w.	0.001	0.039
t/s Franken	F4	497885.26	741618.29	-	2016-03-03	PCB28	mg/kg d.w.	0.0001	0.0001
t/s Franken	F4	497885.26	741618.29	-	2016-03-03	PCB 52	mg/kg d.w.	0.0001	<0.0001
t/s Franken	F4	497885.26	741618.29	-	2016-03-03	PCB 101	mg/kg d.w.	0.0001	<0.0001
t/s Franken	F4	497885.26	741618.29	-	2016-03-03	PCB 118	mg/kg d.w.	0.0001	0.0001
t/s Franken	F4	497885.26	741618.29	-	2016-03-03	PCB 138	mg/kg d.w.	0.0001	<0.0001
t/s Franken	F4	497885.26	741618.29	-	2016-03-03	PCB 153	mg/kg d.w.	0.0001	<0.0001
t/s Franken	F4	497885.26	741618.29	-	2016-03-03	PCB 180	mg/kg d.w.	0.0001	<0.0001
t/s Franken	F4	497885.26	741618.29	-	2016-03-03	∑PCB	mg/kg d.w.	0.0001	0.0002
t/s Franken	F4	497885.26	741618.29	-	2016-03-03	TOC	mg/kg d.w.	1000	24722
t/s Franken	F4	497885.26	741618.29	-	2016-03-03	TPH	mg/kg d.w.	5.0	104
t/s Franken	F5	497793.98	741624.14	-	2016-03-03	benzo[a]anthracene	mg/kg d.w.	0.001	0.011
t/s Franken	F5	497793.98	741624.14	-	2016-03-03	benzo[b]fluoranthene	mg/kg d.w.	0.001	0.029
t/s Franken	F5	497793.98	741624.14	-	2016-03-03	benzo[k]fluoranthene	mg/kg d.w.	0.001	0.016
t/s Franken	F5	497793.98	741624.14	-	2016-03-03	benzo[a]pyrene	mg/kg d.w.	0.001	0.006
t/s Franken	F5	497793.98	741624.14	-	2016-03-03	indeno[1,2,3-cd]pyrene	mg/kg d.w.	0.001	0.018
t/s Franken	F5	497793.98	741624.14	-	2016-03-03	dibenzo[a,h]anthracene	mg/kg d.w.	0.001	0.003
t/s Franken	F5	497793.98	741624.14	-	2016-03-03	benzo[ghi]perylene	mg/kg d.w.	0.001	0.013
t/s Franken	F5	497793.98	741624.14	-	2016-03-03	∑PAH	mg/kg d.w.	0.001	0.096
t/s Franken	F5	497793.98	741624.14	-	2016-03-03	PCB28	mg/kg d.w.	0.0001	0.0010
t/s Franken	F5	497793.98	741624.14	-	2016-03-03	PCB 52	mg/kg d.w.	0.0001	<0.0001
t/s Franken	F5	497793.98	741624.14	-	2016-03-03	PCB 101	mg/kg d.w.	0.0001	0.0006
t/s Franken	F5	497793.98	741624.14	-	2016-03-03	PCB 118	mg/kg d.w.	0.0001	0.0004
t/s Franken	F5	497793.98	741624.14	-	2016-03-03	PCB 138	mg/kg d.w.	0.0001	0.0011
t/s Franken	F5	497793.98	741624.14	-	2016-03-03	PCB 153	mg/kg d.w.	0.0001	0.0015
t/s Franken	F5	497793.98	741624.14	-	2016-03-03	PCB 180	mg/kg d.w.	0.0001	0.0010
t/s Franken	F5	497793.98	741624.14	-	2016-03-03	∑PCB	mg/kg d.w.	0.0001	0.0056
t/s Franken	F5	497793.98	741624.14	-	2016-03-03	TOC	mg/kg d.w.	1000	22564
t/s Franken	F5	497793.98	741624.14	-	2016-03-03	TPH	mg/kg d.w.	5.0	109
S/s Stuttgart	V-01	475783.03	744181.08	-	22/23.02.2016	benzo[a]anthracene	mg/kg d.w.	0.001	0.011
S/s Stuttgart	V-01	475783.03	744181.08	-	22/23.02.2016	benzo[b]fluoranthene	mg/kg d.w.	0.001	0.021
S/s Stuttgart	V-01	475783.03	744181.08	-	22/23.02.2016	benzo[k]fluoranthene	mg/kg d.w.	0.001	0.005
S/s Stuttgart	V-01	475783.03	744181.08	-	22/23.02.2016	benzo[a]pyrene	mg/kg d.w.	0.001	0.004
S/s Stuttgart	V-01	475783.03	744181.08	-	22/23.02.2016	indeno[1,2,3-cd]pyrene	mg/kg d.w.	0.001	0.007
S/s Stuttgart	V-01	475783.03	744181.08	-	22/23.02.2016	dibenzo[a,h]anthracene	mg/kg d.w.	0.001	<0.001
S/s Stuttgart	V-01	475783.03	744181.08	-	22/23.02.2016	benzo[ghi]perylene	mg/kg d.w.	0.001	0.006
S/s Stuttgart	V-01	475783.03	744181.08	-	22/23.02.2016	∑PAH	mg/kg d.w.	0.001	0.054
S/s Stuttgart	V-01	475783.03	744181.08	-	22/23.02.2016	PCB28	mg/kg d.w.	0.0001	<0.0001
S/s Stuttgart	V-01	475783.03	744181.08	-	22/23.02.2016	PCB 52	mg/kg d.w.	0.0001	<0.0001
S/s Stuttgart	V-01	475783.03	744181.08	-	22/23.02.2016	PCB 101	mg/kg d.w.	0.0001	<0.0001
S/s Stuttgart	V-01	475783.03	744181.08	-	22/23.02.2016	PCB 118	mg/kg d.w.	0.0001	<0.0001
S/s Stuttgart	V-01	475783.03	744181.08	-	22/23.02.2016	PCB 138	mg/kg d.w.	0.0001	<0.0001
S/s Stuttgart	V-01	475783.03	744181.08	-	22/23.02.2016	PCB 153	mg/kg d.w.	0.0001	<0.0001
S/s Stuttgart	V-01	475783.03	744181.08	-	22/23.02.2016	PCB 180	mg/kg d.w.	0.0001	<0.0001
S/s Stuttgart	V-01	475783.03	744181.08	-	22/23.02.2016	∑PCB	mg/kg d.w.	0.0001	<0.0001
S/s Stuttgart	V-01	475783.03	744181.08	-	22/23.02.2016	TOC	mg/kg d.w.	1000	22453
S/s Stuttgart	V-01	475783.03	744181.08	-	22/23.02.2016	TPH	mg/kg d.w.	5.0	116
S/s Stuttgart	V-02	475383.51	744358.92	-	22/23.02.2016	benzo[a]anthracene	mg/kg d.w.	0.001	0.38
S/s Stuttgart	V-02	475383.51	744358.92	-	22/23.02.2016	benzo[b]fluoranthene	mg/kg d.w.	0.001	0.56
S/s Stuttgart	V-02	475383.51	744358.92	-	22/23.02.2016	benzo[k]fluoranthene	mg/kg d.w.	0.001	0.098
S/s Stuttgart	V-02	475383.51	744358.92	-	22/23.02.2016	benzo[a]pyrene	mg/kg d.w.	0.001	0.29
S/s Stuttgart	V-02	475383.51	744358.92	-	22/23.02.2016	indeno[1,2,3-cd]pyrene	mg/kg d.w.	0.001	0.27
S/s Stuttgart	V-02	475383.51	744358.92	-	22/23.02.2016	dibenzo[a,h]anthracene	mg/kg d.w.	0.001	0.084
S/s Stuttgart	V-02	475383.51	744358.92	-	22/23.02.2016	benzo[ghi]perylene	mg/kg d.w.	0.001	0.14
S/s Stuttgart	V-02	475383.51	744358.92	-	22/23.02.2016	∑PAH	mg/kg d.w.	0.001	1.8
S/s Stuttgart	V-02	475383.51	744358.92	-	22/23.02.2016	PCB28	mg/kg d.w.	0.0001	<0.0001
S/s Stuttgart	V-02	475383.51	744358.92	-	22/23.02.2016	PCB 52	mg/kg d.w.	0.0001	<0.0001
S/s Stuttgart	V-02	475383.51	744358.92	-	22/23.02.2016	PCB 101	mg/kg d.w.	0.0001	<0.0001
S/s Stuttgart	V-02	475383.51	744358.92	-	22/23.02.2016	PCB 118	mg/kg d.w.	0.0001	<0.0001
S/s Stuttgart	V-02	475383.51	744358.92	-	22/23.02.2016	PCB 138	mg/kg d.w.	0.0001	<0.0001
S/s Stuttgart	V-02	475383.51	744358.92	-	22/23.02.2016	PCB 153	mg/kg d.w.	0.0001	<0.0001
S/s Stuttgart	V-02	475383.51	744358.92	-	22/23.02.2016	PCB 180	mg/kg d.w.	0.0001	<0.0001
S/s Stuttgart	V-02	475383.51	744358.92	-	22/23.02.2016	∑PCB	mg/kg d.w.	0.0001	<0.0001
S/s Stuttgart	V-02	475383.51	744358.92	-	22/23.02.2016	TOC	mg/kg d.w.	1000	22686
S/s Stuttgart	V-02	475383.51	744358.92	-	22/23.02.2016	TPH	mg/kg d.w.	5.0	164
S/s Stuttgart	V-03	475582.77	744827.97	-	22/23.02.2016	benzo[a]anthracene	mg/kg d.w.	0.001	0.003
S/s Stuttgart	V-03	475582.77	744827.97	-	22/23.02.2016	benzo[b]fluoranthene	mg/kg d.w.	0.001	0.006
S/s Stuttgart	V-03	475582.77	744827.97	-	22/23.02.2016	benzo[k]fluoranthene	mg/kg d.w.	0.001	0.002
S/s Stuttgart	V-03	475582.77	744827.97	-	22/23.02.2016	benzo[a]pyrene	mg/kg d.w.	0.001	0.002
S/s Stuttgart	V-03	475582.77	744827.97	-	22/23.02.2016	indeno[1,2,3-cd]pyrene	mg/kg d.w.	0.001	0.003
S/s Stuttgart	V-03	475582.77	744827.97	-	22/23.02.2016	dibenzo[a,h]anthracene	mg/kg d.w.	0.001	<0.001
S/s Stuttgart	V-03	475582.77	744827.97	-	22/23.02.2016	benzo[ghi]perylene	mg/kg d.w.	0.001	0.002
S/s Stuttgart	V-03	475582.77	744827.97	-	22/23.02.2016	∑PAH	mg/kg d.w.	0.001	0.018
S/s Stuttgart	V-03	475582.77	744827.97	-	22/23.02.2016	PCB28	mg/kg d.w.	0.0001	<0.0001
S/s Stuttgart	V-03	475582.77	744827.97	-	22/23.02.2016	PCB 52	mg/kg d.w.	0.0001	<0.0001
S/s Stuttgart	V-03	475582.77	744827.97	-	22/23.02.2016	PCB 101	mg/kg d.w.	0.0001	<0.0001
S/s Stuttgart	V-03	475582.77	744827.97	-	22/23.02.2016	PCB 118	mg/kg d.w.	0.0001	<0.0001
S/s Stuttgart	V-03	475582.77	744827.97	-	22/23.02.2016	PCB 138	mg/kg d.w.	0.0001	<0.0001
S/s Stuttgart	V-03	475582.77	744827.97	-	22/23.02.2016	PCB 153	mg/kg d.w.	0.0001	<0.0001
S/s Stuttgart	V-03	475582.77	744827.97	-	22/23.02.2016	PCB 180	mg/kg d.w.	0.0001	<0.0001
S/s Stuttgart	V-03	475582.77	744827.97	-	22/23.02.2016	∑PCB	mg/kg d.w.	0.0001	<0.0001
S/s Stuttgart	V-03	475582.77	744827.97	-	22/23.02.2016	TOC	mg/kg d.w.	1000	16280
S/s Stuttgart	V-03	475582.77	744827.97	-	22/23.02.2016	TPH	mg/kg d.w.	5.0	94
S/s Stuttgart	V-04	475840.17	745106.2	-	22/23.02.2016	benzo[a]anthracene	mg/kg d.w.	0.001	0.031
S/s Stuttgart	V-04	475840.17	745106.2	-	22/23.02.2016	benzo[b]fluoranthene	mg/kg d.w.	0.001	0.072
S/s Stuttgart	V-04	475840.17	745106.2	-	22/23.02.2016	benzo[k]fluoranthene	mg/kg d.w.	0.001	0.014
S/s Stuttgart	V-04	475840.17	745106.2	-	22/23.02.2016	benzo[a]pyrene	mg/kg d.w.	0.001	0.018
S/s Stuttgart	V-04	475840.17	745106.2	-	22/23.02.2016	indeno[1,2,3-cd]pyrene	mg/kg d.w.	0.001	0.035
S/s Stuttgart	V-04	475840.17	745106.2	-	22/23.02.2016	dibenzo[a,h]anthracene	mg/kg d.w.	0.001	0.009
S/s Stuttgart	V-04	475840.17	745106.2	-	22/23.02.2016	benzo[ghi]perylene	mg/kg d.w.	0.001	0.020
S/s Stuttgart	V-04	475840.17	745106.2	-	22/23.02.2016	∑PAH	mg/kg d.w.	0.001	0.20
S/s Stuttgart	V-04	475840.17	745106.2	-	22/23.02.2016	PCB28	mg/kg d.w.	0.0001	<0.0001
S/s Stuttgart	V-04	475840.17	745106.2	-	22/23.02.2016	PCB 52	mg/kg d.w.	0.0001	<0.0001
S/s Stuttgart	V-04	475840.17	745106.2	-	22/23.02.2016	PCB 101	mg/kg d.w.	0.0001	<0.0001
S/s Stuttgart	V-04	475840.17	745106.2	-	22/23.02.2016	PCB 118	mg/kg d.w.	0.0001	<0.0001
S/s Stuttgart	V-04	475840.17	745106.2	-	22/23.02.2016	PCB 138	mg/kg d.w.	0.0001	<0.0001
S/s Stuttgart	V-04	475840.17	745106.2	-	22/23.02.2016	PCB 153	mg/kg d.w.	0.0001	<0.0001
S/s Stuttgart	V-04	475840.17	745106.2	-	22/23.02.2016	PCB 180	mg/kg d.w.	0.0001	<0.0001
S/s Stuttgart	V-04	475840.17	745106.2	-	22/23.02.2016	∑PCB	mg/kg d.w.	0.0001	<0.0001
S/s Stuttgart	V-04	475840.17	745106.2	-	22/23.02.2016	TOC	mg/kg d.w.	1000	18198
S/s Stuttgart	V-04	475840.17	745106.2	-	22/23.02.2016	TPH	mg/kg d.w.	5.0	94
S/s Stuttgart	V-05	475965.4	744640.64	-	22/23.02.2016	benzo[a]anthracene	mg/kg d.w.	0.001	0.033
S/s Stuttgart	V-05	475965.4	744640.64	-	22/23.02.2016	benzo[b]fluoranthene	mg/kg d.w.	0.001	0.074
S/s Stuttgart	V-05	475965.4	744640.64	-	22/23.02.2016	benzo[k]fluoranthene	mg/kg d.w.	0.001	0.017
S/s Stuttgart	V-05	475965.4	744640.64	-	22/23.02.2016	benzo[a]pyrene	mg/kg d.w.	0.001	0.021
S/s Stuttgart	V-05	475965.4	744640.64	-	22/23.02.2016	indeno[1,2,3-cd]pyrene	mg/kg d.w.	0.001	0.033
S/s Stuttgart	V-05	475965.4	744640.64	-	22/23.02.2016	dibenzo[a,h]anthracene	mg/kg d.w.	0.001	0.010
S/s Stuttgart	V-05	475965.4	744640.64	-	22/23.02.2016	benzo[ghi]perylene	mg/kg d.w.	0.001	0.023
S/s Stuttgart	V-05	475965.4	744640.64	-	22/23.02.2016	∑PAH	mg/kg d.w.	0.001	0.21
S/s Stuttgart	V-05	475965.4	744640.64	-	22/23.02.2016	PCB28	mg/kg d.w.	0.0001	<0.0001
S/s Stuttgart	V-05	475965.4	744640.64	-	22/23.02.2016	PCB 52	mg/kg d.w.	0.0001	<0.0001
S/s Stuttgart	V-05	475965.4	744640.64	-	22/23.02.2016	PCB 101	mg/kg d.w.	0.0001	<0.0001
S/s Stuttgart	V-05	475965.4	744640.64	-	22/23.02.2016	PCB 118	mg/kg d.w.	0.0001	<0.0001
S/s Stuttgart	V-05	475965.4	744640.64	-	22/23.02.2016	PCB 138	mg/kg d.w.	0.0001	<0.0001
S/s Stuttgart	V-05	475965.4	744640.64	-	22/23.02.2016	PCB 153	mg/kg d.w.	0.0001	<0.0001
S/s Stuttgart	V-05	475965.4	744640.64	-	22/23.02.2016	PCB 180	mg/kg d.w.	0.0001	<0.0001
S/s Stuttgart	V-05	475965.4	744640.64	-	22/23.02.2016	∑PCB	mg/kg d.w.	0.0001	<0.0001
S/s Stuttgart	V-05	475965.4	744640.64	-	22/23.02.2016	TOC	mg/kg d.w.	1000	19924
S/s Stuttgart	V-05	475965.4	744640.64	-	22/23.02.2016	TPH	mg/kg d.w.	5.0	116
S/s Stuttgart	V-06	475820.25	744964.15	-	22/23.02.2016	benzo[a]anthracene	mg/kg d.w.	0.001	1.9
S/s Stuttgart	V-06	475820.25	744964.15	-	22/23.02.2016	benzo[b]fluoranthene	mg/kg d.w.	0.001	1.2
S/s Stuttgart	V-06	475820.25	744964.15	-	22/23.02.2016	benzo[k]fluoranthene	mg/kg d.w.	0.001	0.26
S/s Stuttgart	V-06	475820.25	744964.15	-	22/23.02.2016	benzo[a]pyrene	mg/kg d.w.	0.001	0.68
S/s Stuttgart	V-06	475820.25	744964.15	-	22/23.02.2016	indeno[1,2,3-cd]pyrene	mg/kg d.w.	0.001	0.68
S/s Stuttgart	V-06	475820.25	744964.15	-	22/23.02.2016	dibenzo[a,h]anthracene	mg/kg d.w.	0.001	0.78
S/s Stuttgart	V-06	475820.25	744964.15	-	22/23.02.2016	benzo[ghi]perylene	mg/kg d.w.	0.001	0.26
S/s Stuttgart	V-06	475820.25	744964.15	-	22/23.02.2016	∑PAH	mg/kg d.w.	0.001	5.8
S/s Stuttgart	V-06	475820.25	744964.15	-	22/23.02.2016	PCB28	mg/kg d.w.	0.0001	<0.0001
S/s Stuttgart	V-06	475820.25	744964.15	-	22/23.02.2016	PCB 52	mg/kg d.w.	0.0001	<0.0001
S/s Stuttgart	V-06	475820.25	744964.15	-	22/23.02.2016	PCB 101	mg/kg d.w.	0.0001	<0.0001
S/s Stuttgart	V-06	475820.25	744964.15	-	22/23.02.2016	PCB 118	mg/kg d.w.	0.0001	<0.0001
S/s Stuttgart	V-06	475820.25	744964.15	-	22/23.02.2016	PCB 138	mg/kg d.w.	0.0001	0.0008
S/s Stuttgart	V-06	475820.25	744964.15	-	22/23.02.2016	PCB 153	mg/kg d.w.	0.0001	0.0006
S/s Stuttgart	V-06	475820.25	744964.15	-	22/23.02.2016	PCB 180	mg/kg d.w.	0.0001	0.0005
S/s Stuttgart	V-06	475820.25	744964.15	-	22/23.02.2016	∑PCB	mg/kg d.w.	0.0001	0.0019
S/s Stuttgart	V-06	475820.25	744964.15	-	22/23.02.2016	TOC	mg/kg d.w.	1000	21470
S/s Stuttgart	V-06	475820.25	744964.15	-	22/23.02.2016	TPH	mg/kg d.w.	5.0	310
S/s Stuttgart	V-07	475802.89	744875.5	-	22/23.02.2016	benzo[a]anthracene	mg/kg d.w.	0.001	0.14
S/s Stuttgart	V-07	475802.89	744875.5	-	22/23.02.2016	benzo[b]fluoranthene	mg/kg d.w.	0.001	0.17
S/s Stuttgart	V-07	475802.89	744875.5	-	22/23.02.2016	benzo[k]fluoranthene	mg/kg d.w.	0.001	0.032
S/s Stuttgart	V-07	475802.89	744875.5	-	22/23.02.2016	benzo[a]pyrene	mg/kg d.w.	0.001	0.059
S/s Stuttgart	V-07	475802.89	744875.5	-	22/23.02.2016	indeno[1,2,3-cd]pyrene	mg/kg d.w.	0.001	0.089
S/s Stuttgart	V-07	475802.89	744875.5	-	22/23.02.2016	dibenzo[a,h]anthracene	mg/kg d.w.	0.001	0.025
S/s Stuttgart	V-07	475802.89	744875.5	-	22/23.02.2016	benzo[ghi]perylene	mg/kg d.w.	0.001	0.045
S/s Stuttgart	V-07	475802.89	744875.5	-	22/23.02.2016	∑PAH	mg/kg d.w.	0.001	0.56
S/s Stuttgart	V-07	475802.89	744875.5	-	22/23.02.2016	PCB28	mg/kg d.w.	0.0001	<0.0001
S/s Stuttgart	V-07	475802.89	744875.5	-	22/23.02.2016	PCB 52	mg/kg d.w.	0.0001	<0.0001
S/s Stuttgart	V-07	475802.89	744875.5	-	22/23.02.2016	PCB 101	mg/kg d.w.	0.0001	<0.0001
S/s Stuttgart	V-07	475802.89	744875.5	-	22/23.02.2016	PCB 118	mg/kg d.w.	0.0001	<0.0001
S/s Stuttgart	V-07	475802.89	744875.5	-	22/23.02.2016	PCB 138	mg/kg d.w.	0.0001	<0.0001
S/s Stuttgart	V-07	475802.89	744875.5	-	22/23.02.2016	PCB 153	mg/kg d.w.	0.0001	<0.0001
S/s Stuttgart	V-07	475802.89	744875.5	-	22/23.02.2016	PCB 180	mg/kg d.w.	0.0001	<0.0001
S/s Stuttgart	V-07	475802.89	744875.5	-	22/23.02.2016	∑PCB	mg/kg d.w.	0.0001	<0.0001
S/s Stuttgart	V-07	475802.89	744875.5	-	22/23.02.2016	TOC	mg/kg d.w.	1000	30386
S/s Stuttgart	V-07	475802.89	744875.5	-	22/23.02.2016	TPH	mg/kg d.w.	5.0	218
S/s Stuttgart	V-08	475858.16	744750.6	-	22/23.02.2016	benzo[a]anthracene	mg/kg d.w.	0.001	0.087
S/s Stuttgart	V-08	475858.16	744750.6	-	22/23.02.2016	benzo[b]fluoranthene	mg/kg d.w.	0.001	0.11
S/s Stuttgart	V-08	475858.16	744750.6	-	22/23.02.2016	benzo[k]fluoranthene	mg/kg d.w.	0.001	0.022
S/s Stuttgart	V-08	475858.16	744750.6	-	22/23.02.2016	benzo[a]pyrene	mg/kg d.w.	0.001	0.037
S/s Stuttgart	V-08	475858.16	744750.6	-	22/23.02.2016	indeno[1,2,3-cd]pyrene	mg/kg d.w.	0.001	0.036
S/s Stuttgart	V-08	475858.16	744750.6	-	22/23.02.2016	dibenzo[a,h]anthracene	mg/kg d.w.	0.001	0.011
S/s Stuttgart	V-08	475858.16	744750.6	-	22/23.02.2016	benzo[ghi]perylene	mg/kg d.w.	0.001	0.019
S/s Stuttgart	V-08	475858.16	744750.6	-	22/23.02.2016	∑PAH	mg/kg d.w.	0.001	0.32
S/s Stuttgart	V-08	475858.16	744750.6	-	22/23.02.2016	PCB28	mg/kg d.w.	0.0001	<0.0001
S/s Stuttgart	V-08	475858.16	744750.6	-	22/23.02.2016	PCB 52	mg/kg d.w.	0.0001	<0.0001
S/s Stuttgart	V-08	475858.16	744750.6	-	22/23.02.2016	PCB 101	mg/kg d.w.	0.0001	<0.0001
S/s Stuttgart	V-08	475858.16	744750.6	-	22/23.02.2016	PCB 118	mg/kg d.w.	0.0001	<0.0001
S/s Stuttgart	V-08	475858.16	744750.6	-	22/23.02.2016	PCB 138	mg/kg d.w.	0.0001	<0.0001
S/s Stuttgart	V-08	475858.16	744750.6	-	22/23.02.2016	PCB 153	mg/kg d.w.	0.0001	<0.0001
S/s Stuttgart	V-08	475858.16	744750.6	-	22/23.02.2016	PCB 180	mg/kg d.w.	0.0001	<0.0001
S/s Stuttgart	V-08	475858.16	744750.6	-	22/23.02.2016	∑PCB	mg/kg d.w.	0.0001	<0.0001
S/s Stuttgart	V-08	475858.16	744750.6	-	22/23.02.2016	TOC	mg/kg d.w.	1000	17970
S/s Stuttgart	V-08	475858.16	744750.6	-	22/23.02.2016	TPH	mg/kg d.w.	5.0	131
S/s Stuttgart	V-09	475709.87	744697.7	-	22/23.02.2016	benzo[a]anthracene	mg/kg d.w.	0.001	2.5
S/s Stuttgart	V-09	475709.87	744697.7	-	22/23.02.2016	benzo[b]fluoranthene	mg/kg d.w.	0.001	1.8
S/s Stuttgart	V-09	475709.87	744697.7	-	22/23.02.2016	benzo[k]fluoranthene	mg/kg d.w.	0.001	0.33
S/s Stuttgart	V-09	475709.87	744697.7	-	22/23.02.2016	benzo[a]pyrene	mg/kg d.w.	0.001	1.1
S/s Stuttgart	V-09	475709.87	744697.7	-	22/23.02.2016	indeno[1,2,3-cd]pyrene	mg/kg d.w.	0.001	1.1
S/s Stuttgart	V-09	475709.87	744697.7	-	22/23.02.2016	dibenzo[a,h]anthracene	mg/kg d.w.	0.001	1.5
S/s Stuttgart	V-09	475709.87	744697.7	-	22/23.02.2016	benzo[ghi]perylene	mg/kg d.w.	0.001	0.5
S/s Stuttgart	V-09	475709.87	744697.7	-	22/23.02.2016	∑PAH	mg/kg d.w.	0.001	8.8
S/s Stuttgart	V-09	475709.87	744697.7	-	22/23.02.2016	PCB28	mg/kg d.w.	0.0001	<0.0001
S/s Stuttgart	V-09	475709.87	744697.7	-	22/23.02.2016	PCB 52	mg/kg d.w.	0.0001	<0.0001
S/s Stuttgart	V-09	475709.87	744697.7	-	22/23.02.2016	PCB 101	mg/kg d.w.	0.0001	0.0003
S/s Stuttgart	V-09	475709.87	744697.7	-	22/23.02.2016	PCB 118	mg/kg d.w.	0.0001	<0.0001
S/s Stuttgart	V-09	475709.87	744697.7	-	22/23.02.2016	PCB 138	mg/kg d.w.	0.0001	0.0015
S/s Stuttgart	V-09	475709.87	744697.7	-	22/23.02.2016	PCB 153	mg/kg d.w.	0.0001	0.0012
S/s Stuttgart	V-09	475709.87	744697.7	-	22/23.02.2016	PCB 180	mg/kg d.w.	0.0001	0.0009
S/s Stuttgart	V-09	475709.87	744697.7	-	22/23.02.2016	∑PCB	mg/kg d.w.	0.0001	0.0039
S/s Stuttgart	V-09	475709.87	744697.7	-	22/23.02.2016	TOC	mg/kg d.w.	1000	24898
S/s Stuttgart	V-09	475709.87	744697.7	-	22/23.02.2016	TPH	mg/kg d.w.	5.0	197
S/s Stuttgart	V-10	475718.36	744570.93	-	22/23.02.2016	benzo[a]anthracene	mg/kg d.w.	0.001	0.043
S/s Stuttgart	V-10	475718.36	744570.93	-	22/23.02.2016	benzo[b]fluoranthene	mg/kg d.w.	0.001	0.10
S/s Stuttgart	V-10	475718.36	744570.93	-	22/23.02.2016	benzo[k]fluoranthene	mg/kg d.w.	0.001	0.017
S/s Stuttgart	V-10	475718.36	744570.93	-	22/23.02.2016	benzo[a]pyrene	mg/kg d.w.	0.001	0.033
S/s Stuttgart	V-10	475718.36	744570.93	-	22/23.02.2016	indeno[1,2,3-cd]pyrene	mg/kg d.w.	0.001	0.052
S/s Stuttgart	V-10	475718.36	744570.93	-	22/23.02.2016	dibenzo[a,h]anthracene	mg/kg d.w.	0.001	0.015
S/s Stuttgart	V-10	475718.36	744570.93	-	22/23.02.2016	benzo[ghi]perylene	mg/kg d.w.	0.001	0.038
S/s Stuttgart	V-10	475718.36	744570.93	-	22/23.02.2016	∑PAH	mg/kg d.w.	0.001	0.30
S/s Stuttgart	V-10	475718.36	744570.93	-	22/23.02.2016	PCB28	mg/kg d.w.	0.0001	<0.0001
S/s Stuttgart	V-10	475718.36	744570.93	-	22/23.02.2016	PCB 52	mg/kg d.w.	0.0001	<0.0001
S/s Stuttgart	V-10	475718.36	744570.93	-	22/23.02.2016	PCB 101	mg/kg d.w.	0.0001	<0.0001
S/s Stuttgart	V-10	475718.36	744570.93	-	22/23.02.2016	PCB 118	mg/kg d.w.	0.0001	<0.0001
S/s Stuttgart	V-10	475718.36	744570.93	-	22/23.02.2016	PCB 138	mg/kg d.w.	0.0001	<0.0001
S/s Stuttgart	V-10	475718.36	744570.93	-	22/23.02.2016	PCB 153	mg/kg d.w.	0.0001	<0.0001
S/s Stuttgart	V-10	475718.36	744570.93	-	22/23.02.2016	PCB 180	mg/kg d.w.	0.0001	<0.0001
S/s Stuttgart	V-10	475718.36	744570.93	-	22/23.02.2016	∑PCB	mg/kg d.w.	0.0001	<0.0001
S/s Stuttgart	V-10	475718.36	744570.93	-	22/23.02.2016	TOC	mg/kg d.w.	1000	19906
S/s Stuttgart	V-10	475718.36	744570.93	-	22/23.02.2016	TPH	mg/kg d.w.	5.0	520
S/s Stuttgart	V-11	475609.81	744482.13	-	22/23.02.2016	benzo[a]anthracene	mg/kg d.w.	0.001	0.38
S/s Stuttgart	V-11	475609.81	744482.13	-	22/23.02.2016	benzo[b]fluoranthene	mg/kg d.w.	0.001	0.46
S/s Stuttgart	V-11	475609.81	744482.13	-	22/23.02.2016	benzo[k]fluoranthene	mg/kg d.w.	0.001	0.10
S/s Stuttgart	V-11	475609.81	744482.13	-	22/23.02.2016	benzo[a]pyrene	mg/kg d.w.	0.001	0.25
S/s Stuttgart	V-11	475609.81	744482.13	-	22/23.02.2016	indeno[1,2,3-cd]pyrene	mg/kg d.w.	0.001	0.27
S/s Stuttgart	V-11	475609.81	744482.13	-	22/23.02.2016	dibenzo[a,h]anthracene	mg/kg d.w.	0.001	0.33
S/s Stuttgart	V-11	475609.81	744482.13	-	22/23.02.2016	benzo[ghi]perylene	mg/kg d.w.	0.001	0.15
S/s Stuttgart	V-11	475609.81	744482.13	-	22/23.02.2016	∑PAH	mg/kg d.w.	0.001	1.9
S/s Stuttgart	V-11	475609.81	744482.13	-	22/23.02.2016	PCB28	mg/kg d.w.	0.0001	<0.0001
S/s Stuttgart	V-11	475609.81	744482.13	-	22/23.02.2016	PCB 52	mg/kg d.w.	0.0001	<0.0001
S/s Stuttgart	V-11	475609.81	744482.13	-	22/23.02.2016	PCB 101	mg/kg d.w.	0.0001	0.0002
S/s Stuttgart	V-11	475609.81	744482.13	-	22/23.02.2016	PCB 118	mg/kg d.w.	0.0001	<0.0001
S/s Stuttgart	V-11	475609.81	744482.13	-	22/23.02.2016	PCB 138	mg/kg d.w.	0.0001	0.0014
S/s Stuttgart	V-11	475609.81	744482.13	-	22/23.02.2016	PCB 153	mg/kg d.w.	0.0001	0.0010
S/s Stuttgart	V-11	475609.81	744482.13	-	22/23.02.2016	PCB 180	mg/kg d.w.	0.0001	0.0007
S/s Stuttgart	V-11	475609.81	744482.13	-	22/23.02.2016	∑PCB	mg/kg d.w.	0.0001	0.0033
S/s Stuttgart	V-11	475609.81	744482.13	-	22/23.02.2016	TOC	mg/kg d.w.	1000	46034
S/s Stuttgart	V-11	475609.81	744482.13	-	22/23.02.2016	TPH	mg/kg d.w.	5.0	351
S/s Stuttgart	V-12	475756.54	744447.79	-	22/23.02.2016	benzo[a]anthracene	mg/kg d.w.	0.001	0.13
S/s Stuttgart	V-12	475756.54	744447.79	-	22/23.02.2016	benzo[b]fluoranthene	mg/kg d.w.	0.001	0.19
S/s Stuttgart	V-12	475756.54	744447.79	-	22/23.02.2016	benzo[k]fluoranthene	mg/kg d.w.	0.001	0.034
S/s Stuttgart	V-12	475756.54	744447.79	-	22/23.02.2016	benzo[a]pyrene	mg/kg d.w.	0.001	0.062
S/s Stuttgart	V-12	475756.54	744447.79	-	22/23.02.2016	indeno[1,2,3-cd]pyrene	mg/kg d.w.	0.001	0.089
S/s Stuttgart	V-12	475756.54	744447.79	-	22/23.02.2016	dibenzo[a,h]anthracene	mg/kg d.w.	0.001	0.032
S/s Stuttgart	V-12	475756.54	744447.79	-	22/23.02.2016	benzo[ghi]perylene	mg/kg d.w.	0.001	0.048
S/s Stuttgart	V-12	475756.54	744447.79	-	22/23.02.2016	∑PAH	mg/kg d.w.	0.001	0.58
S/s Stuttgart	V-12	475756.54	744447.79	-	22/23.02.2016	PCB28	mg/kg d.w.	0.0001	<0.0001
S/s Stuttgart	V-12	475756.54	744447.79	-	22/23.02.2016	PCB 52	mg/kg d.w.	0.0001	<0.0001
S/s Stuttgart	V-12	475756.54	744447.79	-	22/23.02.2016	PCB 101	mg/kg d.w.	0.0001	<0.0001
S/s Stuttgart	V-12	475756.54	744447.79	-	22/23.02.2016	PCB 118	mg/kg d.w.	0.0001	<0.0001
S/s Stuttgart	V-12	475756.54	744447.79	-	22/23.02.2016	PCB 138	mg/kg d.w.	0.0001	<0.0001
S/s Stuttgart	V-12	475756.54	744447.79	-	22/23.02.2016	PCB 153	mg/kg d.w.	0.0001	<0.0001
S/s Stuttgart	V-12	475756.54	744447.79	-	22/23.02.2016	PCB 180	mg/kg d.w.	0.0001	<0.0001
S/s Stuttgart	V-12	475756.54	744447.79	-	22/23.02.2016	∑PCB	mg/kg d.w.	0.0001	<0.0001
S/s Stuttgart	V-12	475756.54	744447.79	-	22/23.02.2016	TOC	mg/kg d.w.	1000	17769
S/s Stuttgart	V-12	475756.54	744447.79	-	22/23.02.2016	TPH	mg/kg d.w.	5.0	161
S/s Stuttgart	V-13	475864.54	744437.97	-	22/23.02.2016	benzo[a]anthracene	mg/kg d.w.	0.001	0.15
S/s Stuttgart	V-13	475864.54	744437.97	-	22/23.02.2016	benzo[b]fluoranthene	mg/kg d.w.	0.001	0.23
S/s Stuttgart	V-13	475864.54	744437.97	-	22/23.02.2016	benzo[k]fluoranthene	mg/kg d.w.	0.001	0.051
S/s Stuttgart	V-13	475864.54	744437.97	-	22/23.02.2016	benzo[a]pyrene	mg/kg d.w.	0.001	0.078
S/s Stuttgart	V-13	475864.54	744437.97	-	22/23.02.2016	indeno[1,2,3-cd]pyrene	mg/kg d.w.	0.001	0.095
S/s Stuttgart	V-13	475864.54	744437.97	-	22/23.02.2016	dibenzo[a,h]anthracene	mg/kg d.w.	0.001	0.029
S/s Stuttgart	V-13	475864.54	744437.97	-	22/23.02.2016	benzo[ghi]perylene	mg/kg d.w.	0.001	0.053
S/s Stuttgart	V-13	475864.54	744437.97	-	22/23.02.2016	∑PAH	mg/kg d.w.	0.001	0.69
S/s Stuttgart	V-13	475864.54	744437.97	-	22/23.02.2016	PCB28	mg/kg d.w.	0.0001	<0.0001
S/s Stuttgart	V-13	475864.54	744437.97	-	22/23.02.2016	PCB 52	mg/kg d.w.	0.0001	<0.0001
S/s Stuttgart	V-13	475864.54	744437.97	-	22/23.02.2016	PCB 101	mg/kg d.w.	0.0001	0.0003
S/s Stuttgart	V-13	475864.54	744437.97	-	22/23.02.2016	PCB 118	mg/kg d.w.	0.0001	0.0001
S/s Stuttgart	V-13	475864.54	744437.97	-	22/23.02.2016	PCB 138	mg/kg d.w.	0.0001	0.0017
S/s Stuttgart	V-13	475864.54	744437.97	-	22/23.02.2016	PCB 153	mg/kg d.w.	0.0001	0.0013
S/s Stuttgart	V-13	475864.54	744437.97	-	22/23.02.2016	PCB 180	mg/kg d.w.	0.0001	0.0010
S/s Stuttgart	V-13	475864.54	744437.97	-	22/23.02.2016	∑PCB	mg/kg d.w.	0.0001	0.0044
S/s Stuttgart	V-13	475864.54	744437.97	-	22/23.02.2016	TOC	mg/kg d.w.	1000	20276
S/s Stuttgart	V-13	475864.54	744437.97	-	22/23.02.2016	TPH	mg/kg d.w.	5.0	207
S/s Stuttgart	V-14	475710.27	744248.16	-	22/23.02.2016	benzo[a]anthracene	mg/kg d.w.	0.001	0.17
S/s Stuttgart	V-14	475710.27	744248.16	-	22/23.02.2016	benzo[b]fluoranthene	mg/kg d.w.	0.001	0.22
S/s Stuttgart	V-14	475710.27	744248.16	-	22/23.02.2016	benzo[k]fluoranthene	mg/kg d.w.	0.001	0.040
S/s Stuttgart	V-14	475710.27	744248.16	-	22/23.02.2016	benzo[a]pyrene	mg/kg d.w.	0.001	0.092
S/s Stuttgart	V-14	475710.27	744248.16	-	22/23.02.2016	indeno[1,2,3-cd]pyrene	mg/kg d.w.	0.001	0.076
S/s Stuttgart	V-14	475710.27	744248.16	-	22/23.02.2016	dibenzo[a,h]anthracene	mg/kg d.w.	0.001	0.025
S/s Stuttgart	V-14	475710.27	744248.16	-	22/23.02.2016	benzo[ghi]perylene	mg/kg d.w.	0.001	0.040
S/s Stuttgart	V-14	475710.27	744248.16	-	22/23.02.2016	∑PAH	mg/kg d.w.	0.001	0.66
S/s Stuttgart	V-14	475710.27	744248.16	-	22/23.02.2016	PCB28	mg/kg d.w.	0.0001	<0.0001
S/s Stuttgart	V-14	475710.27	744248.16	-	22/23.02.2016	PCB 52	mg/kg d.w.	0.0001	<0.0001
S/s Stuttgart	V-14	475710.27	744248.16	-	22/23.02.2016	PCB 101	mg/kg d.w.	0.0001	<0.0001
S/s Stuttgart	V-14	475710.27	744248.16	-	22/23.02.2016	PCB 118	mg/kg d.w.	0.0001	<0.0001
S/s Stuttgart	V-14	475710.27	744248.16	-	22/23.02.2016	PCB 138	mg/kg d.w.	0.0001	0.0003
S/s Stuttgart	V-14	475710.27	744248.16	-	22/23.02.2016	PCB 153	mg/kg d.w.	0.0001	<0.0001
S/s Stuttgart	V-14	475710.27	744248.16	-	22/23.02.2016	PCB 180	mg/kg d.w.	0.0001	<0.0001
S/s Stuttgart	V-14	475710.27	744248.16	-	22/23.02.2016	∑PCB	mg/kg d.w.	0.0001	0.0003
S/s Stuttgart	V-14	475710.27	744248.16	-	22/23.02.2016	TOC	mg/kg d.w.	1000	27818
S/s Stuttgart	V-14	475710.27	744248.16	-	22/23.02.2016	TPH	mg/kg d.w.	5.0	162
S/s Stuttgart	V-15	475547.15	744311.71	-	22/23.02.2016	benzo[a]anthracene	mg/kg d.w.	0.001	21
S/s Stuttgart	V-15	475547.15	744311.71	-	22/23.02.2016	benzo[b]fluoranthene	mg/kg d.w.	0.001	22
S/s Stuttgart	V-15	475547.15	744311.71	-	22/23.02.2016	benzo[k]fluoranthene	mg/kg d.w.	0.001	4.2
S/s Stuttgart	V-15	475547.15	744311.71	-	22/23.02.2016	benzo[a]pyrene	mg/kg d.w.	0.001	15
S/s Stuttgart	V-15	475547.15	744311.71	-	22/23.02.2016	indeno[1,2,3-cd]pyrene	mg/kg d.w.	0.001	15
S/s Stuttgart	V-15	475547.15	744311.71	-	22/23.02.2016	dibenzo[a,h]anthracene	mg/kg d.w.	0.001	2.8
S/s Stuttgart	V-15	475547.15	744311.71	-	22/23.02.2016	benzo[ghi]perylene	mg/kg d.w.	0.001	8.3
S/s Stuttgart	V-15	475547.15	744311.71	-	22/23.02.2016	∑PAH	mg/kg d.w.	0.001	88
S/s Stuttgart	V-15	475547.15	744311.71	-	22/23.02.2016	PCB28	mg/kg d.w.	0.0001	<0.0001
S/s Stuttgart	V-15	475547.15	744311.71	-	22/23.02.2016	PCB 52	mg/kg d.w.	0.0001	<0.0001
S/s Stuttgart	V-15	475547.15	744311.71	-	22/23.02.2016	PCB 101	mg/kg d.w.	0.0001	<0.0001
S/s Stuttgart	V-15	475547.15	744311.71	-	22/23.02.2016	PCB 118	mg/kg d.w.	0.0001	<0.0001
S/s Stuttgart	V-15	475547.15	744311.71	-	22/23.02.2016	PCB 138	mg/kg d.w.	0.0001	0.0001
S/s Stuttgart	V-15	475547.15	744311.71	-	22/23.02.2016	PCB 153	mg/kg d.w.	0.0001	<0.0001
S/s Stuttgart	V-15	475547.15	744311.71	-	22/23.02.2016	PCB 180	mg/kg d.w.	0.0001	<0.0001
S/s Stuttgart	V-15	475547.15	744311.71	-	22/23.02.2016	∑PCB	mg/kg d.w.	0.0001	0.0001
S/s Stuttgart	V-15	475547.15	744311.71	-	22/23.02.2016	TOC	mg/kg d.w.	1000	13587
S/s Stuttgart	V-15	475547.15	744311.71	-	22/23.02.2016	TPH	mg/kg d.w.	5.0	852
S/s Stuttgart	V-16	475457.57	744271.8	-	22/23.02.2016	benzo[a]anthracene	mg/kg d.w.	0.001	12
S/s Stuttgart	V-16	475457.57	744271.8	-	22/23.02.2016	benzo[b]fluoranthene	mg/kg d.w.	0.001	12
S/s Stuttgart	V-16	475457.57	744271.8	-	22/23.02.2016	benzo[k]fluoranthene	mg/kg d.w.	0.001	2.8
S/s Stuttgart	V-16	475457.57	744271.8	-	22/23.02.2016	benzo[a]pyrene	mg/kg d.w.	0.001	7.2
S/s Stuttgart	V-16	475457.57	744271.8	-	22/23.02.2016	indeno[1,2,3-cd]pyrene	mg/kg d.w.	0.001	7.2
S/s Stuttgart	V-16	475457.57	744271.8	-	22/23.02.2016	dibenzo[a,h]anthracene	mg/kg d.w.	0.001	1.4
S/s Stuttgart	V-16	475457.57	744271.8	-	22/23.02.2016	benzo[ghi]perylene	mg/kg d.w.	0.001	3.9
S/s Stuttgart	V-16	475457.57	744271.8	-	22/23.02.2016	∑PAH	mg/kg d.w.	0.001	47
S/s Stuttgart	V-16	475457.57	744271.8	-	22/23.02.2016	PCB28	mg/kg d.w.	0.0001	<0.0001
S/s Stuttgart	V-16	475457.57	744271.8	-	22/23.02.2016	PCB 52	mg/kg d.w.	0.0001	<0.0001
S/s Stuttgart	V-16	475457.57	744271.8	-	22/23.02.2016	PCB 101	mg/kg d.w.	0.0001	0.0007
S/s Stuttgart	V-16	475457.57	744271.8	-	22/23.02.2016	PCB 118	mg/kg d.w.	0.0001	<0.0001
S/s Stuttgart	V-16	475457.57	744271.8	-	22/23.02.2016	PCB 138	mg/kg d.w.	0.0001	0.0013
S/s Stuttgart	V-16	475457.57	744271.8	-	22/23.02.2016	PCB 153	mg/kg d.w.	0.0001	0.0015
S/s Stuttgart	V-16	475457.57	744271.8	-	22/23.02.2016	PCB 180	mg/kg d.w.	0.0001	0.0012
S/s Stuttgart	V-16	475457.57	744271.8	-	22/23.02.2016	∑PCB	mg/kg d.w.	0.0001	0.0047
S/s Stuttgart	V-16	475457.57	744271.8	-	22/23.02.2016	TOC	mg/kg d.w.	1000	21800
S/s Stuttgart	V-16	475457.57	744271.8	-	22/23.02.2016	TPH	mg/kg d.w.	5.0	934
S/s Stuttgart	V-17	475547.13	744002.62	-	22/23.02.2016	benzo[a]anthracene	mg/kg d.w.	0.001	0.40
S/s Stuttgart	V-17	475547.13	744002.62	-	22/23.02.2016	benzo[b]fluoranthene	mg/kg d.w.	0.001	0.45
S/s Stuttgart	V-17	475547.13	744002.62	-	22/23.02.2016	benzo[k]fluoranthene	mg/kg d.w.	0.001	0.082
S/s Stuttgart	V-17	475547.13	744002.62	-	22/23.02.2016	benzo[a]pyrene	mg/kg d.w.	0.001	0.23
S/s Stuttgart	V-17	475547.13	744002.62	-	22/23.02.2016	indeno[1,2,3-cd]pyrene	mg/kg d.w.	0.001	0.24
S/s Stuttgart	V-17	475547.13	744002.62	-	22/23.02.2016	dibenzo[a,h]anthracene	mg/kg d.w.	0.001	0.058
S/s Stuttgart	V-17	475547.13	744002.62	-	22/23.02.2016	benzo[ghi]perylene	mg/kg d.w.	0.001	0.11
S/s Stuttgart	V-17	475547.13	744002.62	-	22/23.02.2016	∑PAH	mg/kg d.w.	0.001	1.6
S/s Stuttgart	V-17	475547.13	744002.62	-	22/23.02.2016	PCB28	mg/kg d.w.	0.0001	0.0004
S/s Stuttgart	V-17	475547.13	744002.62	-	22/23.02.2016	PCB 52	mg/kg d.w.	0.0001	0.0032
S/s Stuttgart	V-17	475547.13	744002.62	-	22/23.02.2016	PCB 101	mg/kg d.w.	0.0001	0.0014
S/s Stuttgart	V-17	475547.13	744002.62	-	22/23.02.2016	PCB 118	mg/kg d.w.	0.0001	0.0006
S/s Stuttgart	V-17	475547.13	744002.62	-	22/23.02.2016	PCB 138	mg/kg d.w.	0.0001	0.0030
S/s Stuttgart	V-17	475547.13	744002.62	-	22/23.02.2016	PCB 153	mg/kg d.w.	0.0001	0.0008
S/s Stuttgart	V-17	475547.13	744002.62	-	22/23.02.2016	PCB 180	mg/kg d.w.	0.0001	0.0014
S/s Stuttgart	V-17	475547.13	744002.62	-	22/23.02.2016	∑PCB	mg/kg d.w.	0.0001	0.011
S/s Stuttgart	V-17	475547.13	744002.62	-	22/23.02.2016	TOC	mg/kg d.w.	1000	20934
S/s Stuttgart	V-17	475547.13	744002.62	-	22/23.02.2016	TPH	mg/kg d.w.	5.0	94
S/s Stuttgart	V-18	475428.98	744057.51	-	22/23.02.2016	benzo[a]anthracene	mg/kg d.w.	0.001	1.6
S/s Stuttgart	V-18	475428.98	744057.51	-	22/23.02.2016	benzo[b]fluoranthene	mg/kg d.w.	0.001	1.6
S/s Stuttgart	V-18	475428.98	744057.51	-	22/23.02.2016	benzo[k]fluoranthene	mg/kg d.w.	0.001	0.35
S/s Stuttgart	V-18	475428.98	744057.51	-	22/23.02.2016	benzo[a]pyrene	mg/kg d.w.	0.001	1.0
S/s Stuttgart	V-18	475428.98	744057.51	-	22/23.02.2016	indeno[1,2,3-cd]pyrene	mg/kg d.w.	0.001	0.89
S/s Stuttgart	V-18	475428.98	744057.51	-	22/23.02.2016	dibenzo[a,h]anthracene	mg/kg d.w.	0.001	0.20
S/s Stuttgart	V-18	475428.98	744057.51	-	22/23.02.2016	benzo[ghi]perylene	mg/kg d.w.	0.001	0.47
S/s Stuttgart	V-18	475428.98	744057.51	-	22/23.02.2016	∑PAH	mg/kg d.w.	0.001	6.1
S/s Stuttgart	V-18	475428.98	744057.51	-	22/23.02.2016	PCB28	mg/kg d.w.	0.0001	<0.0001
S/s Stuttgart	V-18	475428.98	744057.51	-	22/23.02.2016	PCB 52	mg/kg d.w.	0.0001	<0.0001
S/s Stuttgart	V-18	475428.98	744057.51	-	22/23.02.2016	PCB 101	mg/kg d.w.	0.0001	0.0001
S/s Stuttgart	V-18	475428.98	744057.51	-	22/23.02.2016	PCB 118	mg/kg d.w.	0.0001	<0.0001
S/s Stuttgart	V-18	475428.98	744057.51	-	22/23.02.2016	PCB 138	mg/kg d.w.	0.0001	0.0003
S/s Stuttgart	V-18	475428.98	744057.51	-	22/23.02.2016	PCB 153	mg/kg d.w.	0.0001	0.0002
S/s Stuttgart	V-18	475428.98	744057.51	-	22/23.02.2016	PCB 180	mg/kg d.w.	0.0001	0.0002
S/s Stuttgart	V-18	475428.98	744057.51	-	22/23.02.2016	∑PCB	mg/kg d.w.	0.0001	0.0008
S/s Stuttgart	V-18	475428.98	744057.51	-	22/23.02.2016	TOC	mg/kg d.w.	1000	18598
S/s Stuttgart	V-18	475428.98	744057.51	-	22/23.02.2016	TPH	mg/kg d.w.	5.0	266
S/s Stuttgart	V-19	475272.66	744209.86	-	22/23.02.2016	benzo[a]anthracene	mg/kg d.w.	0.001	0.56
S/s Stuttgart	V-19	475272.66	744209.86	-	22/23.02.2016	benzo[b]fluoranthene	mg/kg d.w.	0.001	0.65
S/s Stuttgart	V-19	475272.66	744209.86	-	22/23.02.2016	benzo[k]fluoranthene	mg/kg d.w.	0.001	0.13
S/s Stuttgart	V-19	475272.66	744209.86	-	22/23.02.2016	benzo[a]pyrene	mg/kg d.w.	0.001	0.42
S/s Stuttgart	V-19	475272.66	744209.86	-	22/23.02.2016	indeno[1,2,3-cd]pyrene	mg/kg d.w.	0.001	0.39
S/s Stuttgart	V-19	475272.66	744209.86	-	22/23.02.2016	dibenzo[a,h]anthracene	mg/kg d.w.	0.001	0.088
S/s Stuttgart	V-19	475272.66	744209.86	-	22/23.02.2016	benzo[ghi]perylene	mg/kg d.w.	0.001	0.20
S/s Stuttgart	V-19	475272.66	744209.86	-	22/23.02.2016	∑PAH	mg/kg d.w.	0.001	2.4
S/s Stuttgart	V-19	475272.66	744209.86	-	22/23.02.2016	PCB28	mg/kg d.w.	0.0001	<0.0001
S/s Stuttgart	V-19	475272.66	744209.86	-	22/23.02.2016	PCB 52	mg/kg d.w.	0.0001	<0.0001
S/s Stuttgart	V-19	475272.66	744209.86	-	22/23.02.2016	PCB 101	mg/kg d.w.	0.0001	0.0001
S/s Stuttgart	V-19	475272.66	744209.86	-	22/23.02.2016	PCB 118	mg/kg d.w.	0.0001	<0.0001
S/s Stuttgart	V-19	475272.66	744209.86	-	22/23.02.2016	PCB 138	mg/kg d.w.	0.0001	0.0002
S/s Stuttgart	V-19	475272.66	744209.86	-	22/23.02.2016	PCB 153	mg/kg d.w.	0.0001	0.0002
S/s Stuttgart	V-19	475272.66	744209.86	-	22/23.02.2016	PCB 180	mg/kg d.w.	0.0001	0.0002
S/s Stuttgart	V-19	475272.66	744209.86	-	22/23.02.2016	∑PCB	mg/kg d.w.	0.0001	0.0007
S/s Stuttgart	V-19	475272.66	744209.86	-	22/23.02.2016	TOC	mg/kg d.w.	1000	31864
S/s Stuttgart	V-19	475272.66	744209.86	-	22/23.02.2016	TPH	mg/kg d.w.	5.0	138
S/s Stuttgart	V-20	475536.59	744527.63	-	22/23.02.2016	benzo[a]anthracene	mg/kg d.w.	0.001	288
S/s Stuttgart	V-20	475536.59	744527.63	-	22/23.02.2016	benzo[b]fluoranthene	mg/kg d.w.	0.001	262
S/s Stuttgart	V-20	475536.59	744527.63	-	22/23.02.2016	benzo[k]fluoranthene	mg/kg d.w.	0.001	73
S/s Stuttgart	V-20	475536.59	744527.63	-	22/23.02.2016	benzo[a]pyrene	mg/kg d.w.	0.001	212
S/s Stuttgart	V-20	475536.59	744527.63	-	22/23.02.2016	indeno[1,2,3-cd]pyrene	mg/kg d.w.	0.001	247
S/s Stuttgart	V-20	475536.59	744527.63	-	22/23.02.2016	dibenzo[a,h]anthracene	mg/kg d.w.	0.001	50
S/s Stuttgart	V-20	475536.59	744527.63	-	22/23.02.2016	benzo[ghi]perylene	mg/kg d.w.	0.001	113
S/s Stuttgart	V-20	475536.59	744527.63	-	22/23.02.2016	∑PAH	mg/kg d.w.	0.001	1245
S/s Stuttgart	V-20	475536.59	744527.63	-	22/23.02.2016	PCB28	mg/kg d.w.	0.0001	<0.0001
S/s Stuttgart	V-20	475536.59	744527.63	-	22/23.02.2016	PCB 52	mg/kg d.w.	0.0001	<0.0001
S/s Stuttgart	V-20	475536.59	744527.63	-	22/23.02.2016	PCB 101	mg/kg d.w.	0.0001	<0.0001
S/s Stuttgart	V-20	475536.59	744527.63	-	22/23.02.2016	PCB 118	mg/kg d.w.	0.0001	<0.0001
S/s Stuttgart	V-20	475536.59	744527.63	-	22/23.02.2016	PCB 138	mg/kg d.w.	0.0001	0.022
S/s Stuttgart	V-20	475536.59	744527.63	-	22/23.02.2016	PCB 153	mg/kg d.w.	0.0001	0.020
S/s Stuttgart	V-20	475536.59	744527.63	-	22/23.02.2016	PCB 180	mg/kg d.w.	0.0001	0.011
S/s Stuttgart	V-20	475536.59	744527.63	-	22/23.02.2016	∑PCB	mg/kg d.w.	0.0001	0.053
S/s Stuttgart	V-20	475536.59	744527.63	-	22/23.02.2016	TOC	mg/kg d.w.	1000	50557
S/s Stuttgart	V-20	475536.59	744527.63	-	22/23.02.2016	TPH	mg/kg d.w.	5.0	11529
